# Supplementary material
Source: Copernicus journal article supplement (doi:10.5194/bg-23-3777-2026)
Supplement: Supplementary file 1 [file Supplemental information for publication.pdf › Supplemental information for publication.pdf]

## Supplemental information

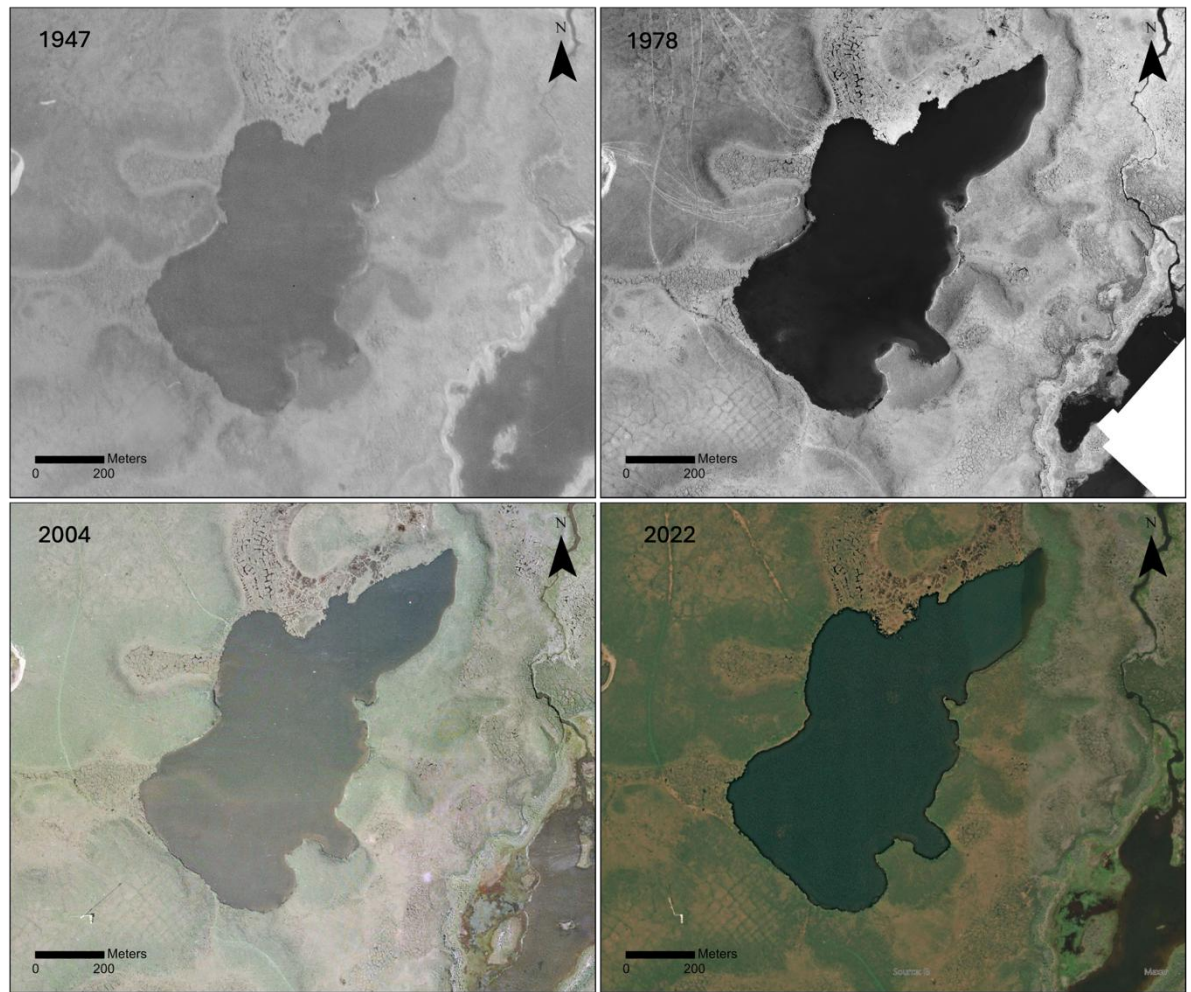

**Figure S1.** Temporal variability of the lake surrounding RP polygonal ground (North of lake), showcasing stability since 1947. Historical imagery was supplied by Natural Resources Canada Air Photo Library.

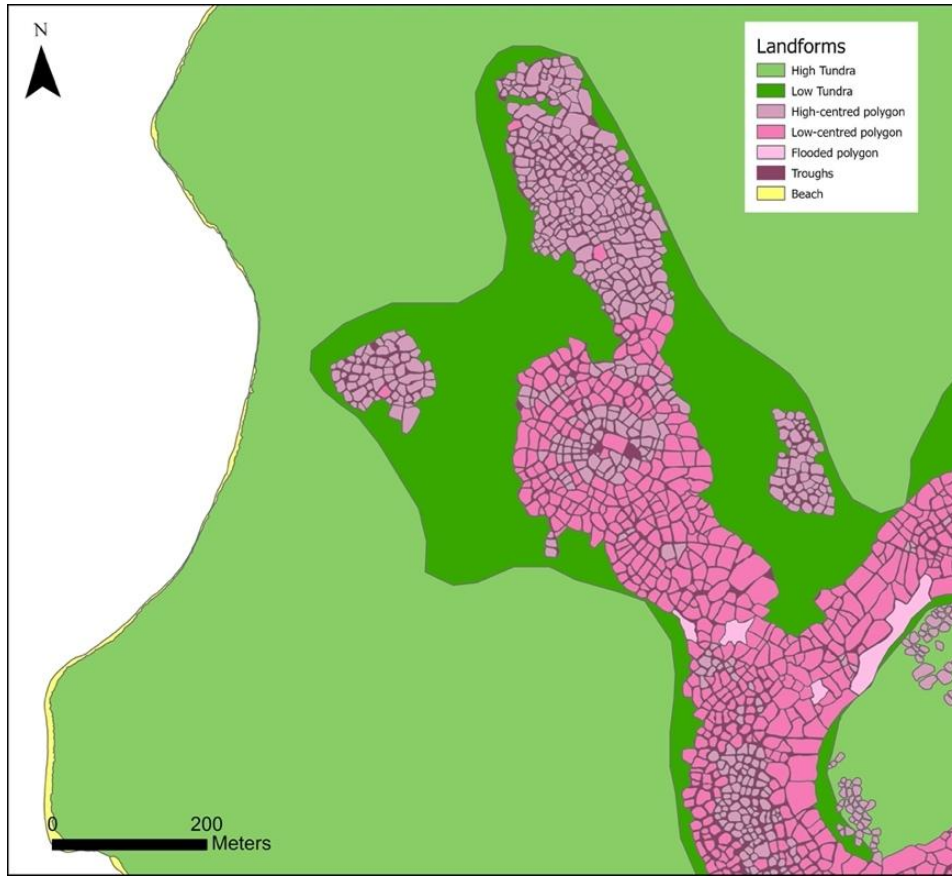

**Figure S2.** Map of Reindeer Point sampling site with delimitation of geomorphological polygonal forms. Forms were drawn based on aerial imagery from 2022.

**Table S1.** Total area occupied by geomorphological landforms, calculated based on manual mapping of landforms in QGIS.

| Landforms            | Total Area (m <sup>2</sup> ) | Total Area (km <sup>2</sup> ) |
|----------------------|------------------------------|-------------------------------|
| Beach                | 6015.912428                  | 0.006015912                   |
| Low-centred polygon  | 118900.6299                  | 0.11890063                    |
| High-centred polygon | 80309.59466                  | 0.080309595                   |
| Troughs              | 36151.97771                  | 0.036151978                   |
| Low Tundra           | 164338.4158                  | 0.164338416                   |
| High Tundra          | 942531.362                   | 0.942531362                   |

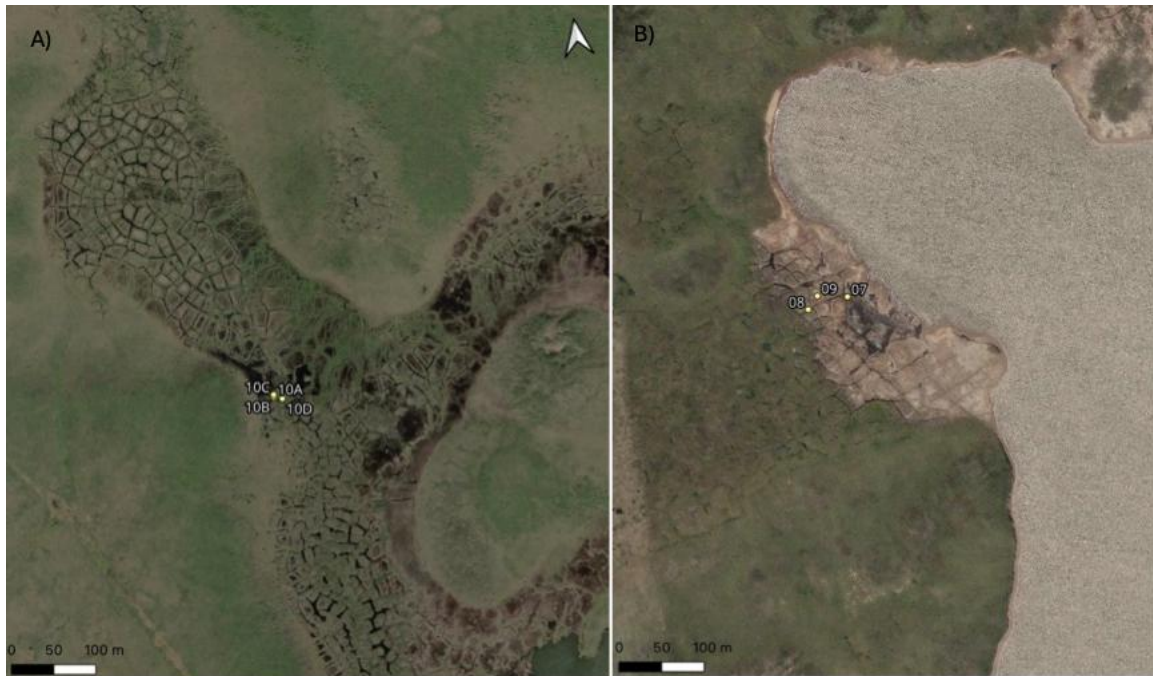

**Figure S3.** High-resolution satellite imagery of a) Reindeer Point (10A, 10B, 10C, 10D) and b) Toker Point (07, 08, 09) (ESRI, 2022 | Powered by Esri).

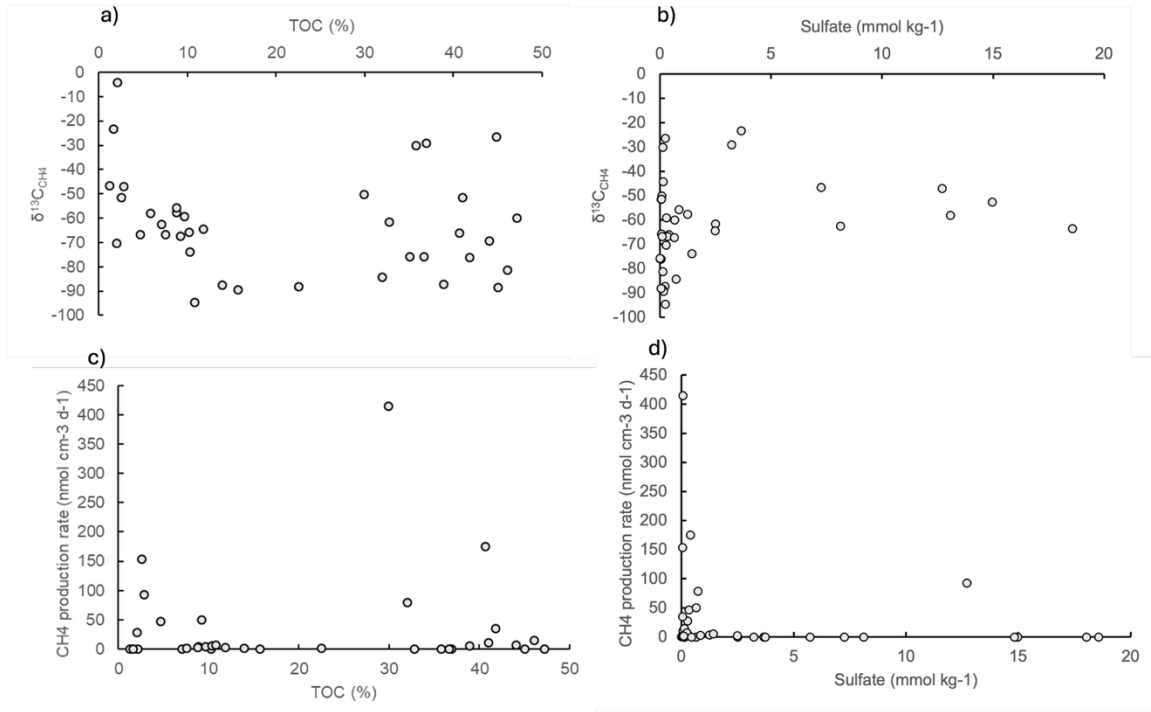

**Figure S4.** Relationships between stable carbon isotope composition of methane ( $\delta^{13}\text{C}-\text{CH}_4$ ), total organic carbon (TOC), sulfate concentration, and methane production rates across all sampled depths and sites. Upper

panels show  $\delta^{13}\text{C}$ -  $\text{CH}_4$  as a function of TOC (a) and sulfate concentration (b). Lower panels show  $\text{CH}_4$  production rates as a function of TOC (c) and sulfate concentration (d). Each point represents one sampled depth. No consistent relationship is observed between  $\delta^{13}\text{C}$ -  $\text{CH}_4$  or  $\text{CH}_4$  production rates and either TOC content or sulfate concentration across landforms or depths, indicating that isotopic signatures and  $\text{CH}_4$  production are not straightforwardly predicted by bulk organic carbon abundance or sulfate availability at the scale investigated.

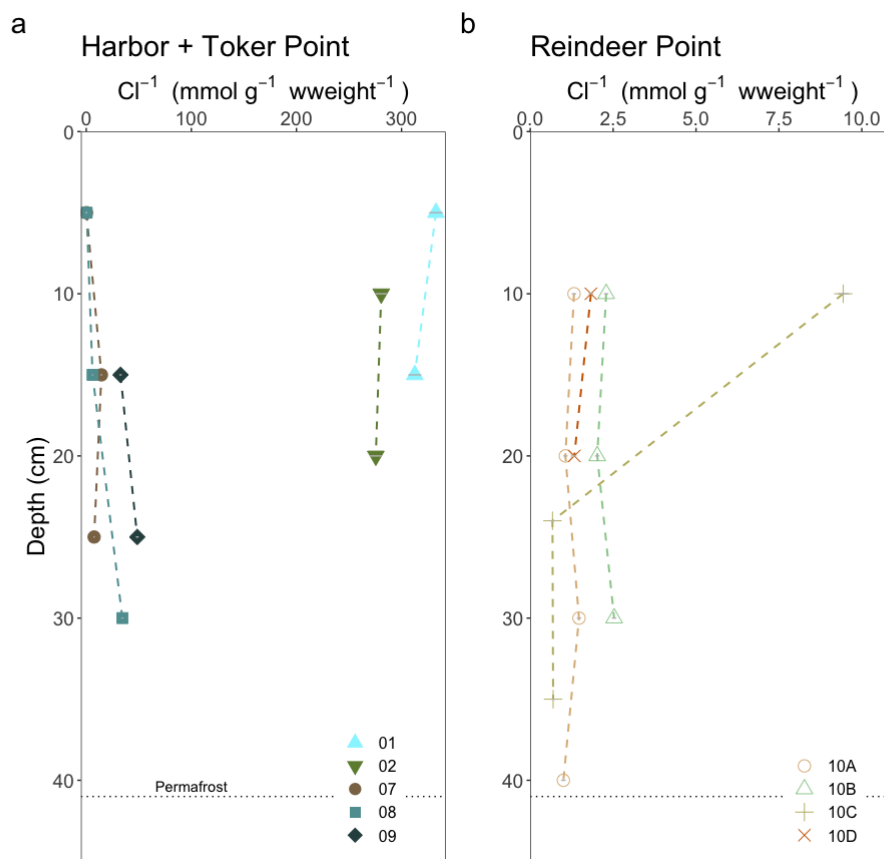

**Figure S5.** Cl<sup>-</sup> concentrations in (a) Harbor + Toker Point and (b) Reindeer Point soil and sediments used in the incubation experiment.

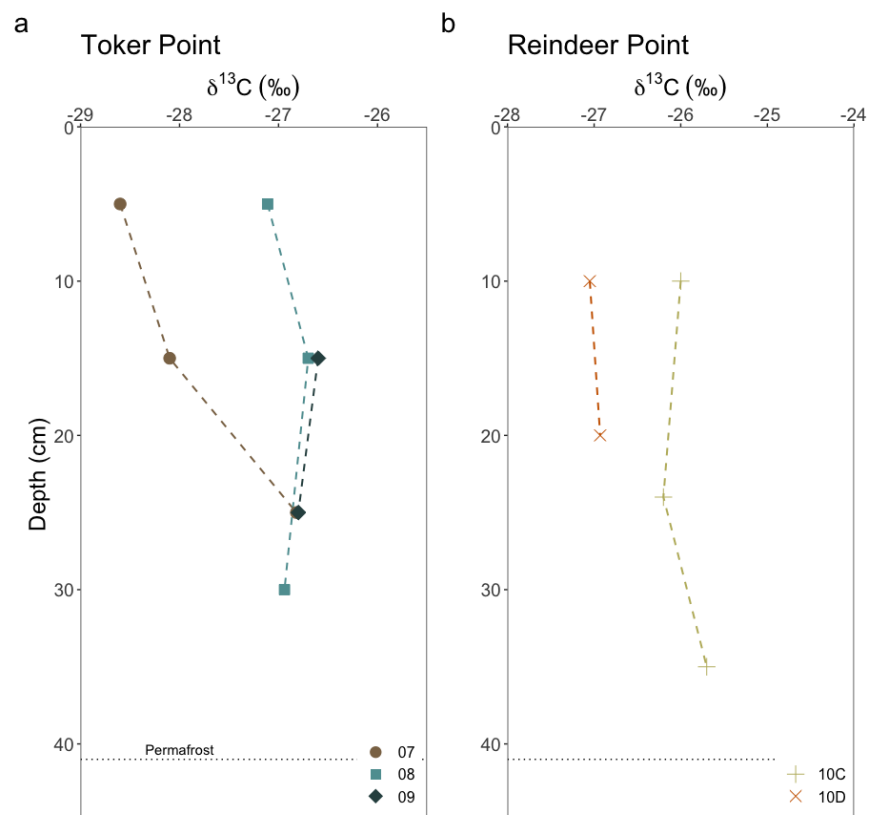

**Figure S6.**  $\delta^{13}\text{C}$  of (a) Harbor + Toker Point and (b) Reindeer Point sediments used in the incubation experiment. Values measured within the range of terrestrial OM (Fu et al., 1993).

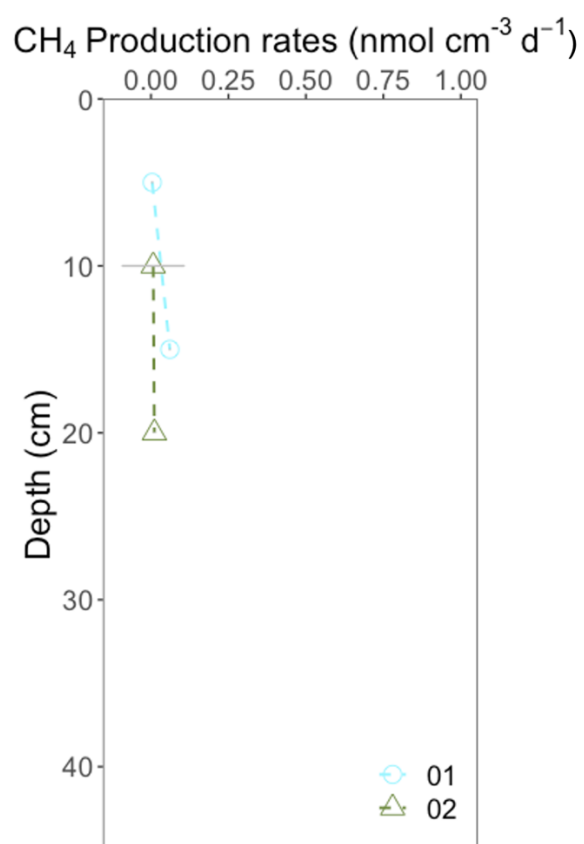

**Figure S7.** CH<sub>4</sub> production rates in marine sediments cores collected from the Harbor. The error bar on measured values represents the standard deviation on the mean of triplicates.
