# Supplementary material
Source: Copernicus journal article supplement (doi:10.5194/bg-23-3777-2026)
Supplement: Supplementary file [file bg-23-3777-2026-supplement-title-page.pdf › bg-23-3777-2026-supplement-title-page.pdf]

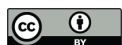

## *Supplement of*

# **Addition of brackish water to tundra soils does not inhibit methane production: implications for Arctic coastal methane production**

**Alexie Roy-Lafontaine et al.**

*Correspondence to:* Alexie Roy-Lafontaine (alexieroylafontaine@gmail.com)

- [bg-23-3777-2026-supplement-title-page.pdf](#)
- [Supplemental information for publication.pdf](#)
- [Supplemental information.xlsx](#)

The copyright of individual parts of the supplement might differ from the article licence.
